# Supplementary material
Source: PubMed Central journal article supplement (PMC3974845)

## Supporting Information

### Structure-activity studies of phosphopeptidomimetic prodrugs targeting the Src homology

### 2 (SH2) domain of signal transducer and activator of transcription 3 (Stat3)

Pijus K. Mandal, Zhiyong Ren, Xiaomin Chen, Kumar Kaluarachchi, Warren S.-L. Liao, and

John S. McMurray

|                                                                                                             |    |
|-------------------------------------------------------------------------------------------------------------|----|
| <b>Table S1</b> $^1\text{H}$ NMR (500MHz, $\text{CDCl}_3$ ) $\delta$ for <i>trans</i> <b>27</b> .....       | S2 |
| <b>Table S2.</b> $^1\text{H}$ NMR (500MHz, $\text{CDCl}_3$ ) $\delta$ Table for <i>cis</i> <b>27</b> :..... | S3 |
| $^{13}\text{C}$ NMR chemicals shifts for <i>cis</i> and <i>trans</i> <b>27</b> .....                        | S3 |
| $^1\text{H}$ NMR Spectrum of <b>27</b> .....                                                                | S4 |
| COSY NMR Spectrum of <b>27</b> .....                                                                        | S5 |
| COSY NMR Spectrum of <b>27</b> NH- $\alpha$ CH region.....                                                  | S6 |
| ROESY NMR Spectrum of <b>27</b> .....                                                                       | S7 |
| $^{13}\text{C}$ NMR Spectrum of <b>27</b> .....                                                             | S8 |

**Table S1**  $^1\text{H}$  NMR (500MHz,  $\text{CDCl}_3$ )  $\delta$  for *trans* **27**:

|                    | bMe-Cinn                                               | POM                        | Nle                          | 4,4-Me <sub>2</sub> Pro                                    | 4-Aminopentamide                                             |
|--------------------|--------------------------------------------------------|----------------------------|------------------------------|------------------------------------------------------------|--------------------------------------------------------------|
| NH                 |                                                        |                            | 6.92 (d, $J = 8.0$ Hz)       |                                                            | 6.35 (d, $J = 9.0$ Hz)                                       |
| $\alpha$ -H        | 6.12 (s, 1H)                                           |                            | 4.78 (m, 1H)                 | 4.30 (t, 1H, $J = 8.5$ Hz)                                 | 3.99 (m, 1H)                                                 |
| $\beta$ -H         |                                                        |                            | 1.73 (m, 1H)<br>1.51 (m, 1H) | 1.89 (d, $J = 8.5$ Hz)                                     | 1.88 (m, 1H),<br>1.54 (m, 1H),<br>1.10 (d, $J = 6.5$ Hz, 3H) |
| $\gamma$ -H        | 2.51 (s, 3H)                                           |                            | 1.3 (m)                      |                                                            | 2.32 (m)<br>2.19 (m)                                         |
| $\delta$ -H        |                                                        |                            | 0.83 (br tr)                 | 3.35 (d, $J = 10.0$ Hz, 1H)<br>3.70 (d, $J = 10.0$ Hz, 1H) |                                                              |
| Aromatic           | 7.56 (d, $J = 8.0$ Hz, 2H), 7.48 (d, $J = 8.0$ Hz, 2H) |                            |                              |                                                            |                                                              |
| NH <sub>2</sub>    |                                                        |                            |                              |                                                            | 6.92 (brs, 1H),<br>5.87 (brs, 1H)                            |
| Methyl             |                                                        |                            |                              | 1.16 (s, 3H),<br>1.04 (s, 3H)                              |                                                              |
| Methylene          |                                                        | 5.71 (m, 2H), 5.63 (m, 2H) |                              |                                                            |                                                              |
| <i>tert</i> -Butyl |                                                        | 1.20 (s)                   |                              |                                                            |                                                              |

**Table S2.**  $^1\text{H}$ NMR (500MHz,  $\text{CDCl}_3$ )  $\delta$  Table for *cis* **27**:

|                    | bMe-Cinn | POM | Nle        | 4,4-Me <sub>2</sub> Pro | 4-Aminopentamide |
|--------------------|----------|-----|------------|-------------------------|------------------|
| NH                 |          |     | 6.88       |                         | 6.61             |
| $\alpha$ -H        |          |     | 4.42       | 4.335                   | 4.01             |
| $\beta$ -H         |          |     |            |                         |                  |
| $\gamma$ -H        |          |     |            |                         |                  |
| $\delta$ -H        |          |     | 3.14, 3.59 |                         |                  |
| Aromatic           |          |     |            |                         |                  |
| NH <sub>2</sub>    |          |     |            |                         |                  |
| Methyl             | 2.45     |     |            |                         |                  |
| Methylene          |          |     |            |                         |                  |
| <i>tert</i> -Butyl |          |     |            |                         |                  |

Major isomer:

$^{13}\text{C}$  NMR ( $\text{CDCl}_3$ , 125 MHz)  $\delta$  13.9, 17.5, 21.3, 22.5, 25.5, 26.0, 26.3, 26.7, 27.2, 32.0, 32.4, 33.3, 38.7, 38.8, 42.4, 44.7, 50.6, 50.7, 60.3, 60.8, 82.4, 82.5, 121.1, 126.4, 126.5, 145.5, 149.8, 166.1, 171.4, 172.2, 176.3, 176.5.

Minor isomer:

$^{13}\text{C}$  NMR ( $\text{CDCl}_3$ , 125 MHz)  $\delta$  22.6, 25.8, 26.9, 27.4, 36.7, 45.0, 116.1, 117.9, 131.5

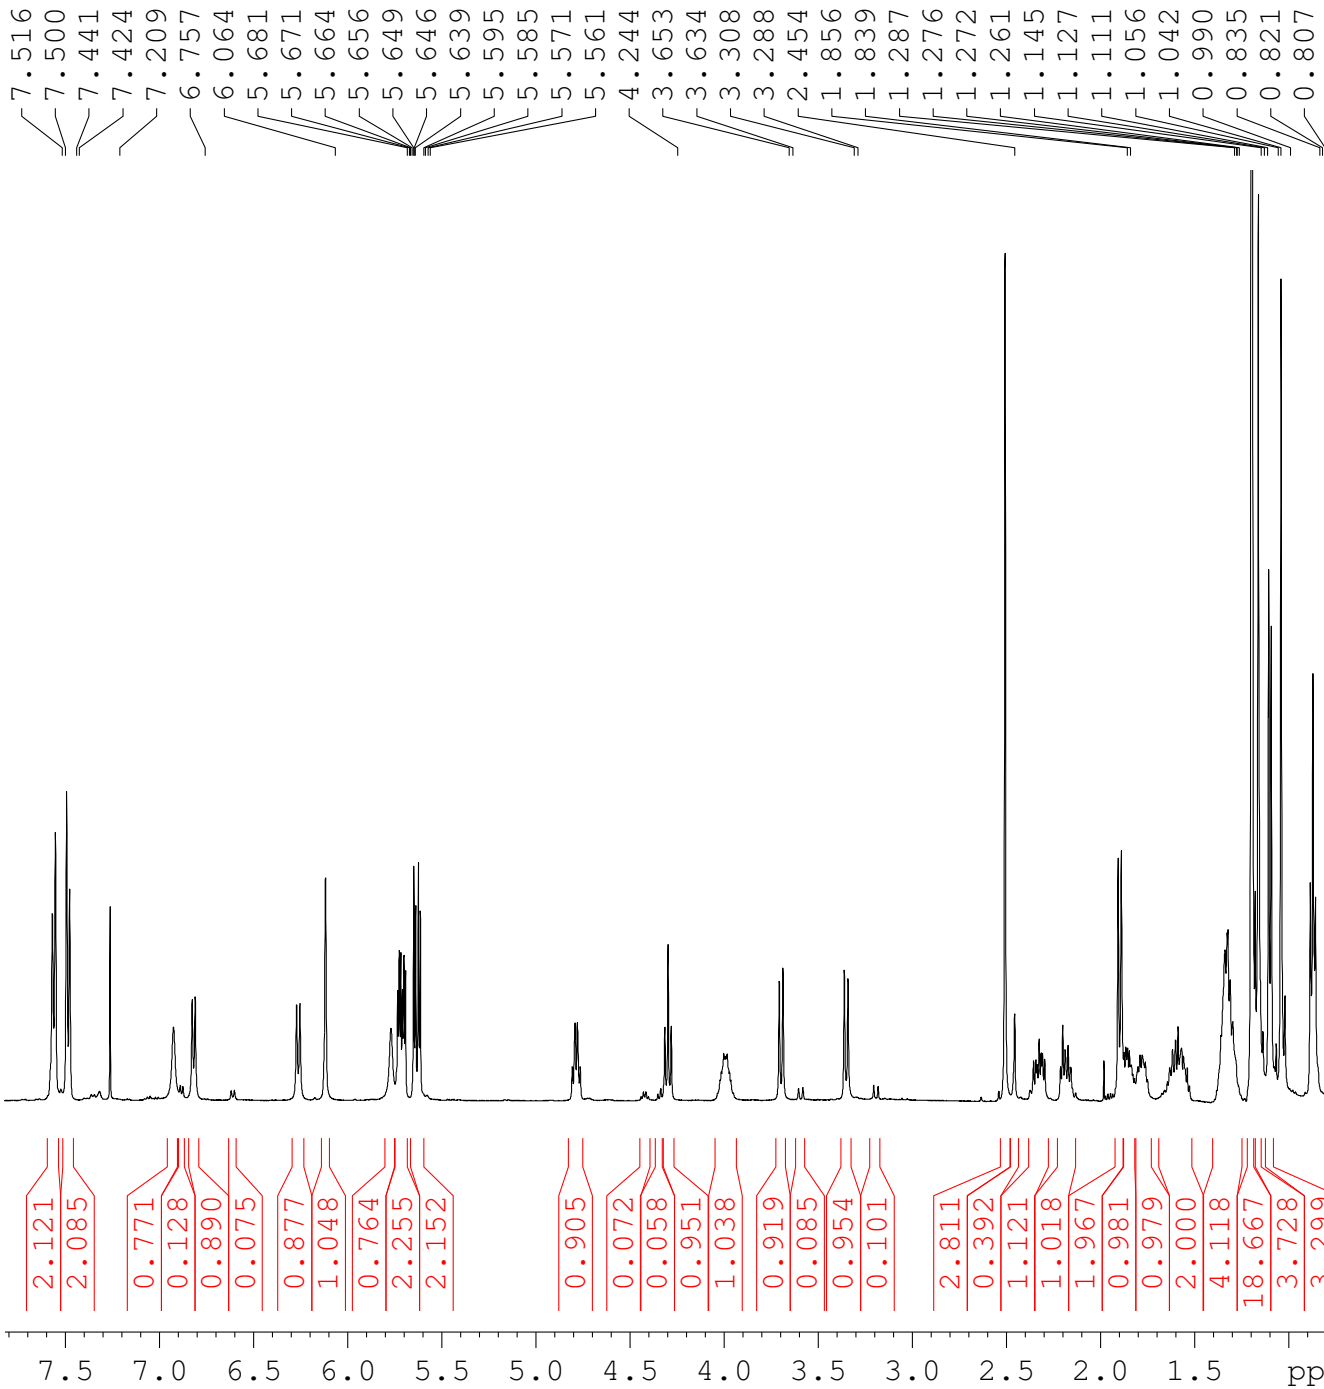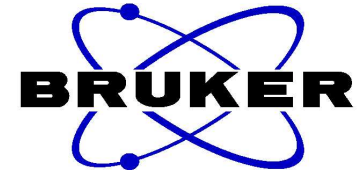

```

NAME                289G
EXPNO                1
PROCNO              1
Date_               20110731
Time                17.54
INSTRUM             spect
PROBHD              5 mm TXI 1H/D-
PULPROG             zg30
TD                  65536
SOLVENT             CDC13
NS                   64
DS                   2
SWH                 10330.578 Hz
FIDRES              0.157632 Hz
AQ                  3.1720407 sec
RG                   406.4
DW                   48.400 use
DE                   6.00 use
TE                   302.2 K
D1                   1.00000000 sec
TD0                  1
  
```

```

===== CHANNEL f1 =====
NUC1                 1H
P1                   8.65 use
PL1                  -2.00 dB
SFO1                 500.0580880 MHz
SI                   32768
SF                   500.0550127 MHz
WDW                   EM
SSB                   0
LB                   0.30 Hz
GB                   0
PC                   1.00
  
```

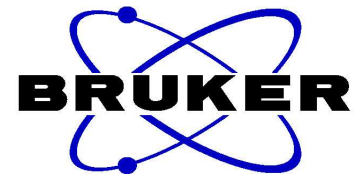

NAME 289G  
EXPNO 2  
PROCNO 1  
Date\_ 20110731  
Time 17.59  
INSTRUM spect  
PROBHD 5 mm TXI 1H/D-  
PULPROG cosygpgqf  
TD 2048  
SOLVENT DMSO  
NS 3  
DS 8  
SWH 6666.667 Hz  
FIDRES 3.255208 Hz  
AQ 0.1537250 sec  
RG 64  
DW 75.000 usec  
DE 6.00 usec  
TE 302.2 K  
d0 0.00000300 sec  
D1 1.48689198 sec  
d13 0.00000400 sec  
D16 0.00020000 sec  
IN0 0.00015000 sec

===== CHANNEL f1 =====  
NUC1 1H  
P0 8.65 usec  
P1 8.65 usec  
PL1 -2.00 dB  
SFO1 500.0580064 MHz

===== GRADIENT CHANNEL =====  
GPNAM1 SINE.100  
GPNAM2 SINE.100  
GPZ1 10.00 %  
GPZ2 10.00 %  
P16 1000.00 usec  
ND0 1  
TD 128  
SFO1 500.058 MHz  
FIDRES 52.083332 Hz  
SW 13.332 ppm  
FnMODE QF  
SI 1024  
SF 500.0550106 MHz  
WDW SINE  
SSB 0  
LB 0.00 Hz  
GB 0  
PC 1.00  
SI 1024  
MC2 QF  
SF 500.0550112 MHz  
WDW SINE  
SSB 0  
LB 0.00 Hz  
GB 0

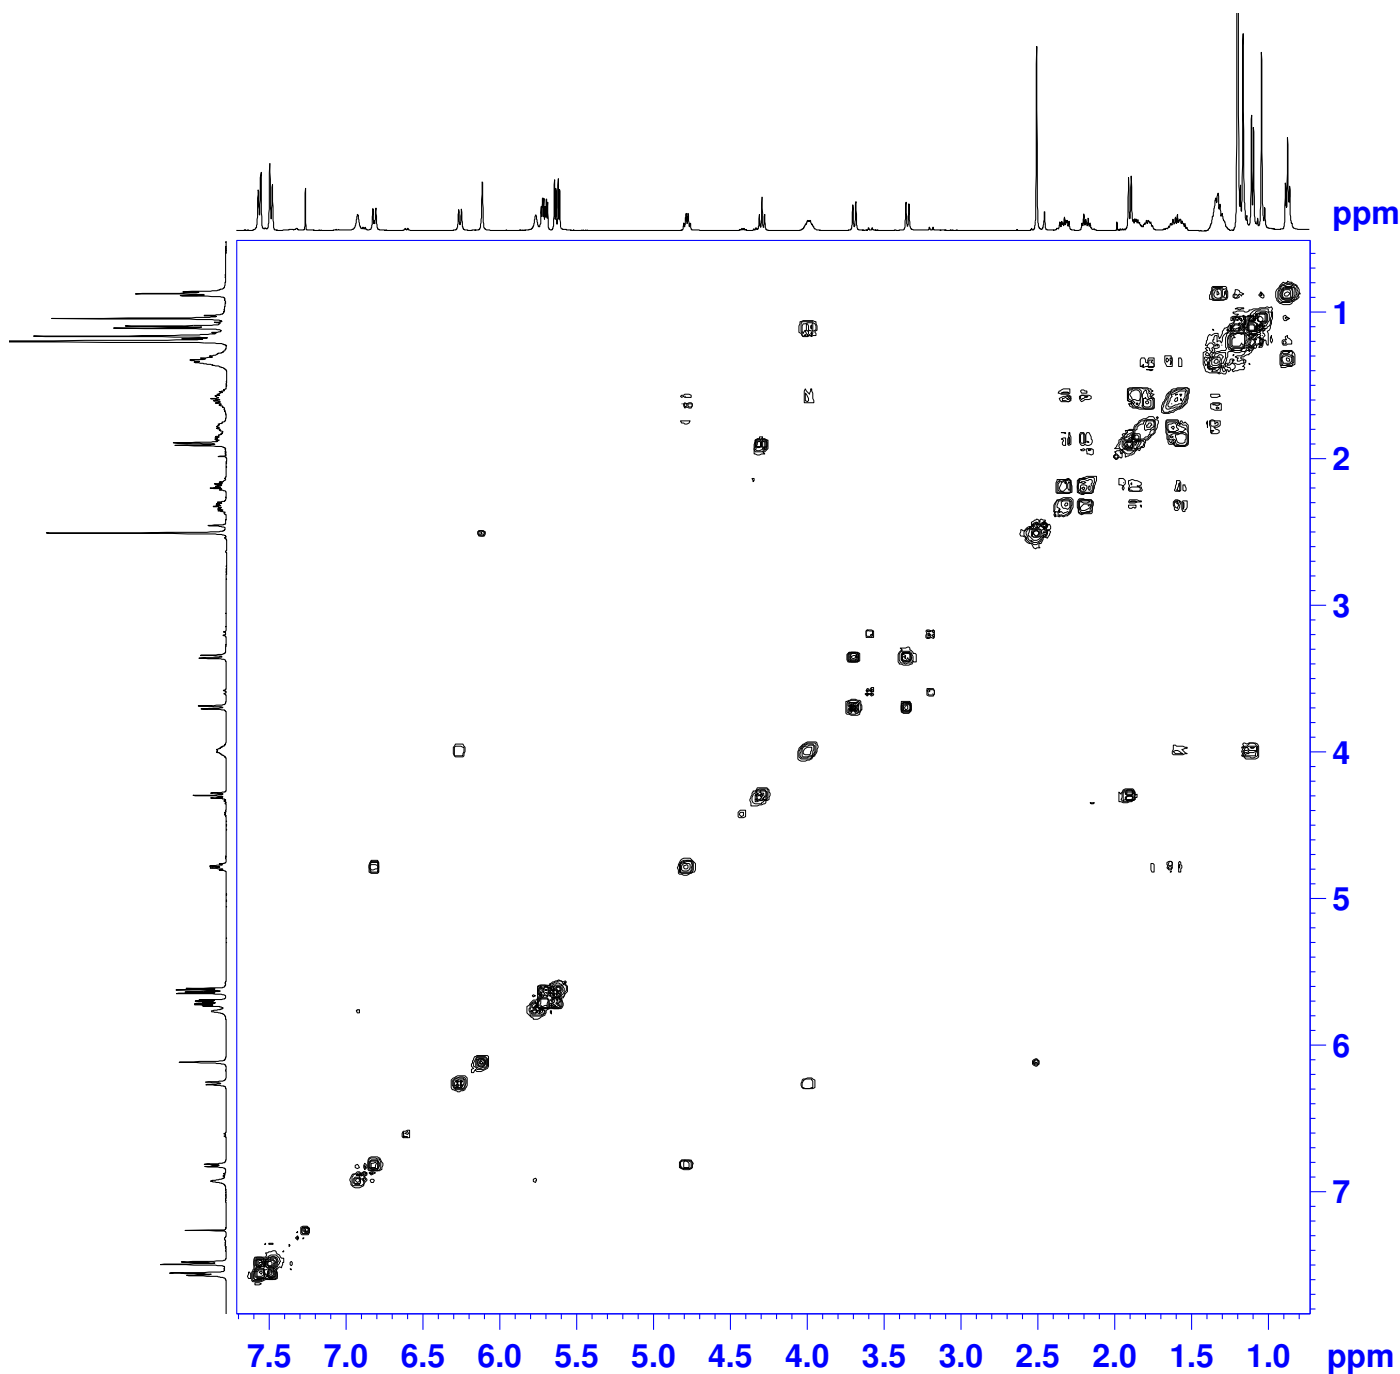



NAME 289G  
EXPNO 2  
PROCNO 1  
Date\_ 20110731  
Time 17.59  
INSTRUM spect  
PROBHD 5 mm TXI 1H/D-  
PULPROG cosygpgqf  
TD 2048  
SOLVENT DMSO  
NS 3  
DS 8  
SWH 6666.667 Hz  
FIDRES 3.255208 Hz  
AQ 0.1537250 sec  
RG 64  
DW 75.000 usec  
DE 6.00 usec  
TE 302.2 K  
d0 0.00000300 sec  
D1 1.48689198 sec  
d13 0.00000400 sec  
D16 0.00020000 sec  
IN0 0.00015000 sec

===== CHANNEL f1 =====  
NUC1 1H  
P0 8.65 usec  
P1 8.65 usec  
PL1 -2.00 dB  
SFO1 500.0580064 MHz

===== GRADIENT CHANNEL =====  
GPNAM1 SINE.100  
GPNAM2 SINE.100  
GPZ1 10.00 %  
GPZ2 10.00 %  
P16 1000.00 usec  
ND0 1  
TD 128  
SFO1 500.058 MHz  
FIDRES 52.083332 Hz  
SW 13.332 ppm  
FnMODE QF  
SI 1024  
SF 500.0550106 MHz  
WDW SINE  
SSB 0  
LB 0.00 Hz  
GB 0  
PC 1.00  
SI 1024  
MC2 QF  
SF 500.0550112 MHz  
WDW SINE  
SSB 0  
LB 0.00 Hz  
GB 0

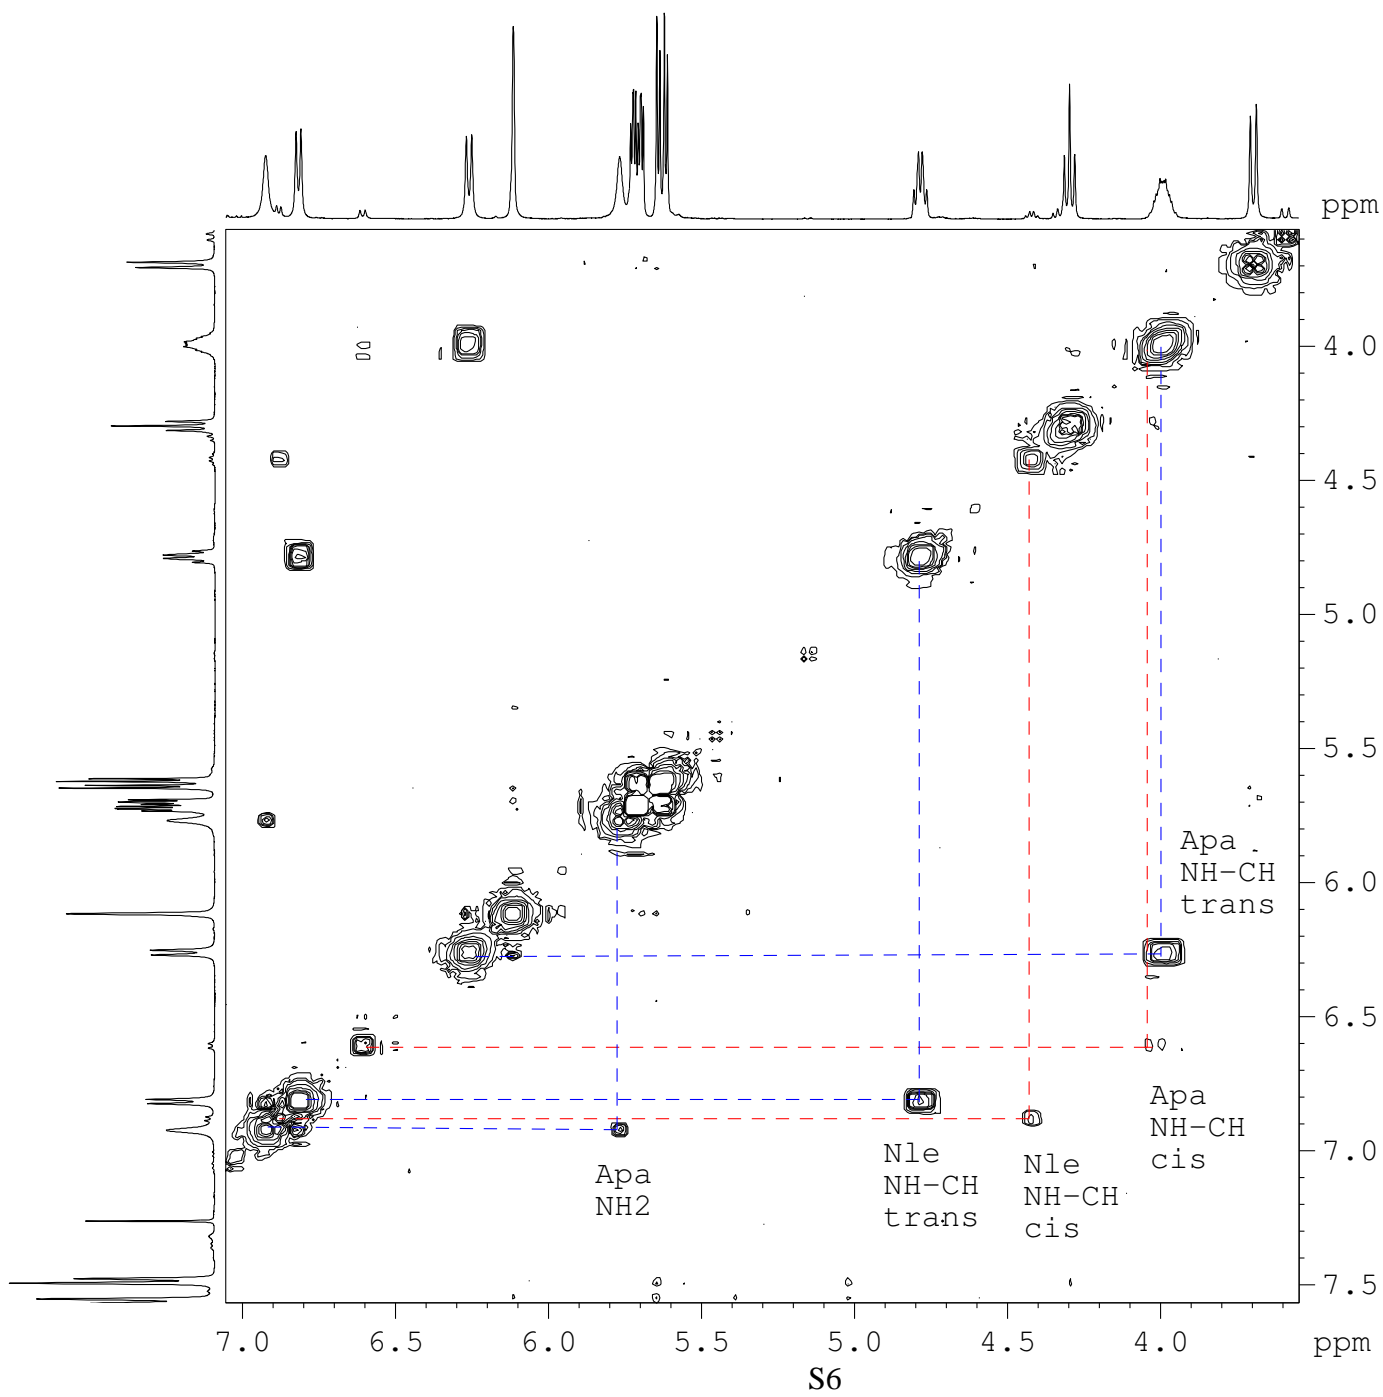

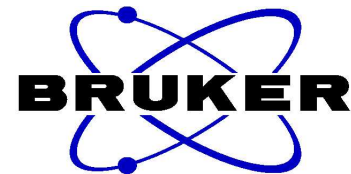

NAME 289G\_08112011  
EXPNO 2  
PROCNO 1  
Date\_ 20110811  
Time 17.32  
INSTRUM spect  
PROBHD 5 mm TXI 1H/D-  
PULPROG roesyetgp  
TD 4096  
SOLVENT CDCl3  
NS 24  
DS 16  
SWH 5122.951 Hz  
FIDRES 1.250720 Hz  
AQ 0.3999172 sec  
RG 64  
DW 97.600 usec  
DE 6.00 usec  
TE 301.2 K  
d0 0.00000300 sec  
D1 4.00000000 sec  
d11 0.03000000 sec  
D16 0.00020000 sec  
DELTA 0.00120300 sec  
DELTA1 0.00120800 sec  
IN0 0.00019520 sec  
ST1CNT 0

===== CHANNEL f1 =====  
NUC1 1H  
P1 8.95 usec  
p2 17.90 usec  
P15 250000.00 usec  
PL1 -2.00 dB  
PL11 19.79 dB  
SFO1 500.0569002 MHz

===== GRADIENT CHANNEL =====  
GPNAM1 SINE.100  
GPNAM2 SINE.100  
GPZ1 30.00 %  
GPZ2 30.00 %  
P16 1000.00 usec  
ND0 1  
TD 256  
SFO1 500.0569 MHz  
FIDRES 20.011526 Hz  
SW 10.245 ppm  
FnMODE Echo-Antiecho  
SI 2048  
SF 500.0550121 MHz  
WDW QSINE  
SSB 2  
LB 0.00 Hz  
GB 0  
PC 1.00  
SI 1024  
MC2 echo-antiecho  
SF 500.0550109 MHz  
WDW QSINE  
SSB 2  
LB 0.00 Hz  
GB 0

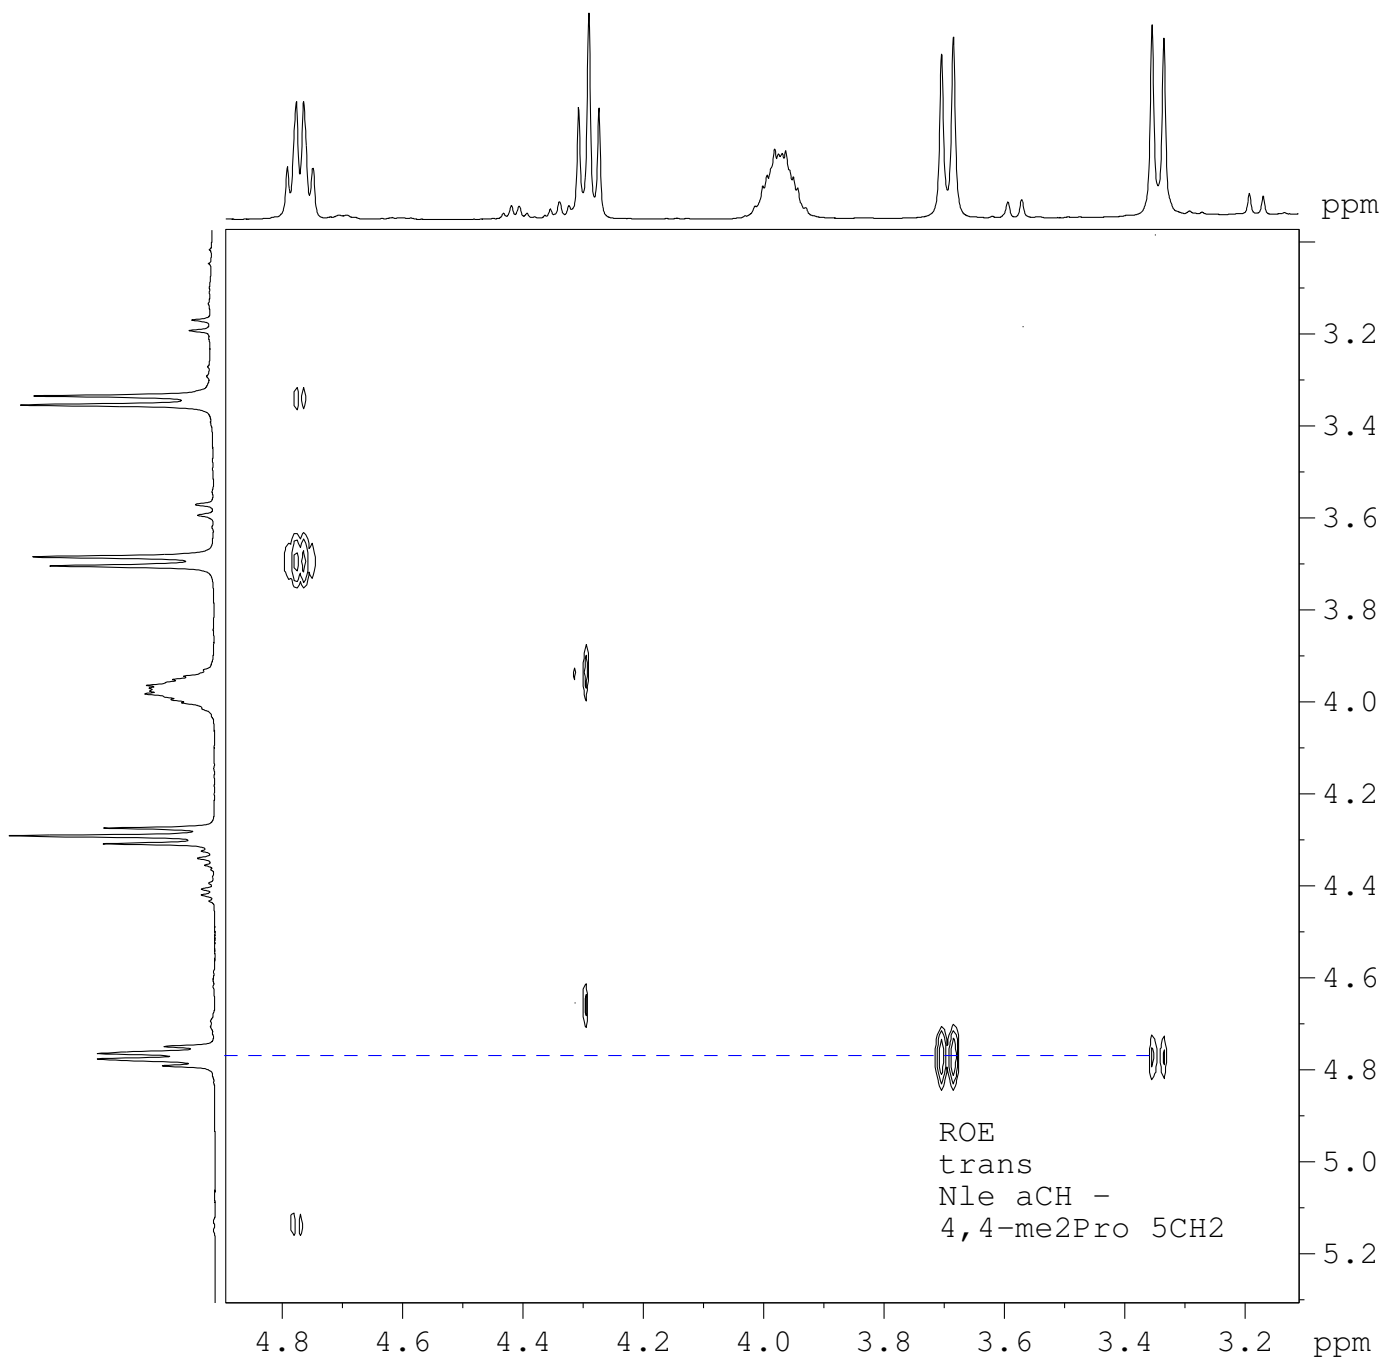

ROE  
trans  
Nle aCH -  
4,4-me2Pro 5CH2

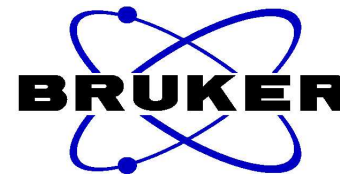

176.52  
176.30  
172.21  
171.39  
166.06

149.74  
145.51

131.47  
126.51  
126.39  
121.08  
117.86  
116.06

82.48  
82.42  
77.29  
77.04  
76.78  
60.77  
60.26  
50.66  
44.71  
42.41  
38.83  
38.72  
36.74  
33.31  
32.37  
32.04  
27.39  
27.21  
27.18  
26.85  
26.73  
26.02  
25.82  
25.51  
22.62  
22.45  
21.27  
17.46

NAME 289G-13C-08292011  
EXPNO 1  
PROCNO 1  
Date\_ 20110829  
Time 11.45  
INSTRUM spect  
PROBHD 5 mm TXI 1H/D-  
PULPROG zgpg30  
TD 65536  
SOLVENT CDC13  
NS 3616  
DS 4  
SWH 30030.029 Hz  
FIDRES 0.458222 Hz  
AQ 1.0912410 sec  
RG 2896.3  
DW 16.650 usec  
DE 6.00 usec  
TE 303.2 K  
D1 2.00000000 sec  
d11 0.03000000 sec  
DELTA 1.89999998 sec  
TD0 1

==== CHANNEL f1 =====  
NUC1 13C  
P1 11.25 usec  
PL1 -5.50 dB  
SFO1 125.7515037 MHz

==== CHANNEL f2 =====  
CPDPRG2 waltz16  
NUC2 1H  
PCPD2 90.00 usec  
PL2 -2.00 dB  
PL12 18.05 dB  
PL13 20.00 dB  
SFO2 500.0570002 MHz  
SI 32768  
SF 125.7389300 MHz  
WDW EM  
SSB 0  
LB 1.00 Hz  
GB 0  
PC 1.40

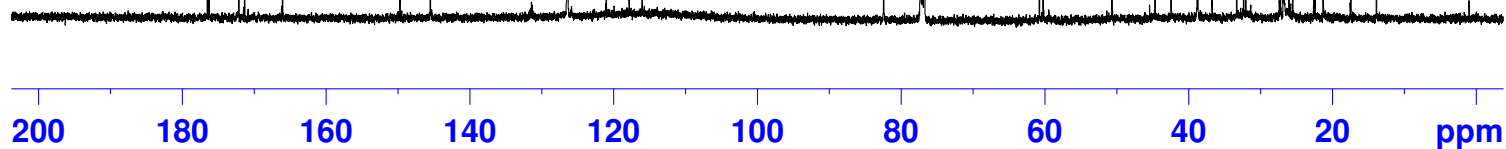

Supplement: NIHMS444410-supplement-1.pdf [file NIHMS444410-supplement-1.pdf]
